# Supplementary material for: Indicaxanthin Induces Autophagy in Intestinal Epithelial Cancer Cells by Epigenetic Mechanisms Involving DNA Methylation
Source: MDPI journal article supplement (doi:10.3390/nu15153495), 2023-08-07
Supplement: s1 [file s1]

## **Indicaxanthin induces autophagy in intestinal epithelial cancer cells by epigenetic mechanisms involving DNA methylation**

### **Nutrients**

Maria Antonietta Ragusa, Ilenia Cruciata, Chiara La Rosa, Chiara Schimmenti, Flores Naselli, Sara Volpes, Graziella Serio, Maurizio Mauro, Mariangela Librizzi, Claudio Luparello, Roberto Chiarelli, Antonino Lauria, Carla Gentile, Fabio Caradonna

Corresponding author: Carla Gentile, Università di Palermo, Dipartimento di Scienze e Tecnologie Biologiche Chimiche e Farmaceutiche (STEBICEF), Palermo, Italia. E-mail: [carla.gentile@unipa.it](mailto:carla.gentile@unipa.it)

**Supplemental material: Tables S1-S8 and Figures S1-S4**

**Table S1:** Complete list of selected genes and chromosomal ranges corresponding to their promoters and gene bodies

| gene       | strand | hg38.coordinates              | chr   | prom.start | prom.end  | body.start | body.end  |
|------------|--------|-------------------------------|-------|------------|-----------|------------|-----------|
| MTOR       | -1     | chr1:11,106,535-11,262,551    | chr1  | 11261551   | 11263551  | 11106535   | 11261551  |
| ULK1       | 1      | chr12:131,894,622-131,923,150 | chr12 | 131893622  | 131895622 | 131895622  | 131923150 |
| ULK2       | -1     | chr17:19,770,830-19,867,936   | chr17 | 19866936   | 19868936  | 19770830   | 19866936  |
| ATG13      | 1      | chr11:46,617,577-46,674,520   | chr11 | 46616577   | 46618577  | 46618577   | 46674520  |
| ATG101     | 1      | chr12:52,069,971-52,077,494   | chr12 | 52068971   | 52070971  | 52070971   | 52077494  |
| RB1CC1     | -1     | chr8:52,622,458-52,714,435    | chr8  | 52713435   | 52715435  | 52622458   | 52713435  |
| ATG9A      | -1     | chr2:219,219,380-219,229,717  | chr2  | 219228717  | 219230717 | 219219380  | 219228717 |
| BECN1      | -1     | chr17:42,810,134-42,824,282   | chr17 | 42823282   | 42825282  | 42810134   | 42823282  |
| PIK3C3     | 1      | chr18:41,955,234-42,087,830   | chr18 | 41954234   | 41956234  | 41956234   | 42087830  |
| PIK3R4     | -1     | chr3:130,678,934-130,746,829  | chr3  | 130745829  | 130747829 | 130678934  | 130745829 |
| ATG14      | -1     | chr14:55,366,392-55,411,858   | chr14 | 55410858   | 55412858  | 55366392   | 55410858  |
| AMBRA1     | -1     | chr11:46,396,414-46,591,364   | chr11 | 46592948   | 46594948  | 46396414   | 46592948  |
| UVRAG      | 1      | chr11:75,815,210-76,144,232   | chr11 | 75814210   | 75816210  | 75816210   | 76144232  |
| NRFB2      | 1      | chr10:63,133,328-63,155,024   | chr10 | 63132328   | 63134328  | 63134328   | 63155024  |
| TFEB.1     | -1     | chr6:41,683,978-41,735,608    | chr6  | 41734608   | 41736608  | 41683978   | 41734608  |
| TFEB.2     | -1     | chr6:41,683,978-41,735,608    | chr6  | 41733570   | 41736782  | 41683978   | 41733570  |
| BCL2.1     | -1     | chr18:63,123,346-63,320,128   | chr18 | 63319128   | 63321128  | 63123346   | 63319128  |
| BCL2.2     | -1     | chr18:63,313,802-63,318,812   | chr18 | 63317812   | 63319812  | 63313802   | 63317812  |
| ATG3       | -1     | chr3:112,532,510-112,561,962  | chr3  | 112560962  | 112562962 | 112532510  | 112560962 |
| ATG5       | -1     | chr6:106,184,476-106,325,760  | chr6  | 106324760  | 106326760 | 106184476  | 106324760 |
| ATG7       | 1      | chr3:11,272,416-11,557,665    | chr3  | 11271416   | 11273416  | 11273416   | 11557665  |
| ATG12      | -1     | chr5:115,828,200-115,841,565  | chr5  | 115840565  | 115842565 | 115828200  | 115840565 |
| ATG16L1    | 1      | chr2:233,251,673-233,295,669  | chr2  | 233250673  | 233252673 | 233252673  | 233295669 |
| ATG10      | 1      | chr5:81,972,023-82,256,133    | chr5  | 81971023   | 81973023  | 81973023   | 82256133  |
| MAP1LC3B.1 | 1      | chr16:87,383,953-87,404,779   | chr16 | 87382953   | 87384953  | 87384953   | 87404779  |
| MAP1LC3B.2 | 1      | chr16:87,383,953-87,404,779   | chr16 | 87391745   | 87392506  | 87392506   | 87404779  |
| WIPI1      | -1     | chr17:68,421,281-68,457,496   | chr17 | 68456496   | 68458496  | 68421281   | 68456496  |
| WIPI2      | 1      | chr7:5,190,196-5,231,524      | chr7  | 5189196    | 5191196   | 5191196    | 5231524   |
| WDR45B     | -1     | chr17:82,614,562-82,648,444   | chr17 | 82647444   | 82649444  | 82614562   | 82647444  |
| WDR45.1    | -1     | chrX:49,074,640-49,101,121    | chrX  | 49100121   | 49102121  | 49074640   | 49100121  |
| WDR45.2    | -1     | chrX:49,074,640-49,101,121    | chrX  | 49079073   | 49081073  | 49074640   | 49079073  |
| RUBCN.1    | -1     | chr3:197,668,867-197,736,904  | chr3  | 197735904  | 197737904 | 197668867  | 197735904 |
| RUBCN.2    | -1     | chr3:197,668,867-197,736,904  | chr3  | 197748699  | 197750699 | 197668867  | 197748699 |
| RAB7A      | 1      | chr3:128,726,122-128,814,796  | chr3  | 128725122  | 128727122 | 128727122  | 128814796 |

|           |    |                               |       |           |           |           |           |
|-----------|----|-------------------------------|-------|-----------|-----------|-----------|-----------|
| PLEKHM1   | -1 | chr17:45,435,900-45,490,721   | chr17 | 45489721  | 45491721  | 45435900  | 45489721  |
| TECPR1    | -1 | chr7:98,214,624-98,252,232    | chr7  | 98251232  | 98253232  | 98214624  | 98251232  |
| EPG5      | -1 | chr18:45,847,609-45,967,329   | chr18 | 45966329  | 45968329  | 45847609  | 45966329  |
| INPP5E    | -1 | chr9:136,428,619-136,439,845  | chr9  | 136438845 | 136440845 | 136428619 | 136438845 |
| STX17     | 1  | chr9:99,906,654-99,974,534    | chr9  | 99905645  | 99907645  | 99907645  | 99974534  |
| SNAP29    | 1  | chr22:20,859,007-20,891,214   | chr22 | 20858007  | 20860007  | 20860007  | 20891214  |
| VAMP8.1   | 1  | chr2:85,577,586-85,582,031    | chr2  | 85576491  | 85578491  | 85578491  | 85582031  |
| VAMP8.2   | 1  | chr2:85,577,586-85,582,031    | chr2  | 85560720  | 85562493  | 85562493  | 85582031  |
| VPS11     | 1  | chr11:119,067,692-119,081,978 | chr11 | 119066692 | 119068692 | 119068692 | 119081978 |
| VPS16     | 1  | chr20:2,840,745-2,866,732     | chr20 | 2839745   | 2841745   | 2841745   | 2866732   |
| VPS18     | 1  | chr15:40,894,450-40,903,975   | chr15 | 40893450  | 40895450  | 40895450  | 40903975  |
| VPS33A    | -1 | chr12:122,229,564-122,266,494 | chr12 | 122265494 | 122267494 | 122229564 | 122265494 |
| VPS39     | -1 | chr15:42,158,701-42,208,316   | chr15 | 42207316  | 42209316  | 42158701  | 42207316  |
| VPS41     | -1 | chr7:38,722,974-38,909,191    | chr   | 38908191  | 38910191  | 38722974  | 38908191  |
| SH3GLB1   | 1  | chr1:86,704,576-86,748,184    | chr1  | 86703576  | 86705576  | 86705576  | 86748184  |
| MAPK8.1   | 1  | chr10:48,401,648-48,439,360   | chr10 | 48400612  | 48402612  | 48402612  | 48439360  |
| MAPK8.2   | 1  | chr10:48,401,648-48,439,360   | chr10 | 48305743  | 48307743  | 48307743  | 48439360  |
| DAPK3.1   | -1 | chr19:3,958,453-3,971,099     | chr19 | 3970099   | 3972099   | 3958453   | 3970099   |
| DAPK3.2   | -1 | chr19:3,958,453-3,971,099     | chr19 | 3968828   | 3970828   | 3958453   | 3968828   |
| GABARAPL2 | 1  | chr16:75,566,379-75,577,881   | chr16 | 75565379  | 75567379  | 75567379  | 75577881  |
| MAP1LC3A  | 1  | chr20:34,558,718-34,560,345   | chr20 | 34557718  | 34559718  | 34559718  | 34560345  |
| TSNARE1.1 | -1 | chr8:142,212,080-142,403,182  | chr8  | 142402182 | 142404182 | 142212080 | 142402182 |
| TSNARE1.2 | -1 | chr8:142,212,080-142,403,182  | chr8  | 142353805 | 142355805 | 142212080 | 142353805 |
| YKT6      | 1  | chr7:44,200,978-44,214,294    | chr7  | 44199978  | 44201978  | 44201978  | 44214294  |
| USE1      | 1  | chr19:17,215,357-17,219,829   | chr19 | 17214357  | 17216357  | 17216357  | 17219829  |
| SNAP25    | 1  | chr20:10,218,830-10,307,418   | chr20 | 10217830  | 10219830  | 10219830  | 10307418  |

**Table S2.** Oligonucleotides used in this study, related to MSRE-PCR method.

| <i>BECN1</i> CpG sites          | Primer sequences                           | Expected fragment size (bp) |
|---------------------------------|--------------------------------------------|-----------------------------|
| <i>HpaII</i> / <i>MspI</i> -126 | Forward: 5'-GACTTGGGTGACGGGCTCCG-3'        | 145                         |
|                                 | Reverse: 5'-ACAGCCTGAGCAAAGGCAGTTTAGAGC-3' |                             |
| <i>HpaII</i> / <i>MspI</i> -255 | Forward: 5'-TCCCAGGTGAAGAGCATCG-3'         | 189                         |
|                                 | Reverse: 5'-GAGGGAAGTCCCAACCTGCG-3'        |                             |
| <i>HhaI</i> -299                | Forward: 5'-CCGAGGCCACAGTGCCTCCG-3'        | 302                         |
|                                 | Reverse: 5'-AAGCGACGCCCTTGACCTCCG-3'       |                             |
| <i>HhaI</i> -472                | Forward: 5'-GGGACTTCCCTCCCTTTACCATC-3'     | 282                         |
|                                 | Reverse: 5'-ACCTTCCACATTCTTGACCACCC-3'     |                             |

Primers used for amplification of *BECN1* promoter CpG sites. Genome coordinates of CpG analysed: 472=42,823,819/20; 299=42,823,991/2; 255=42,824,036/7; 126=42,824,165/6

**Figures S1-S3.** RRBS datasets statistical analysis:

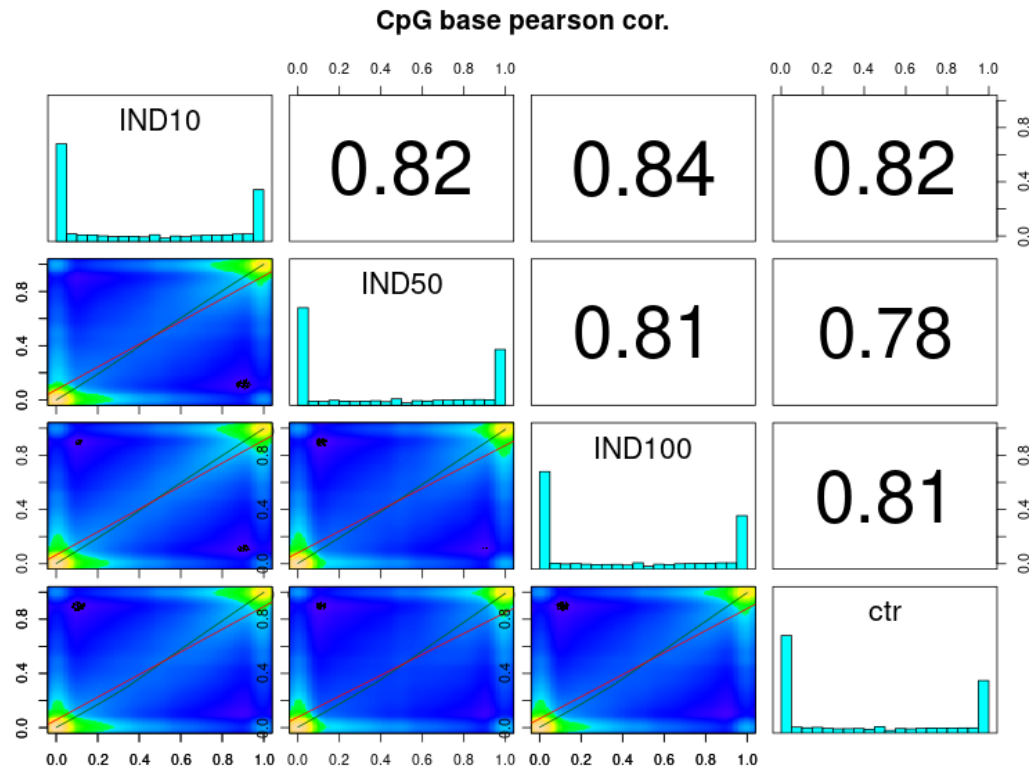

**Figure S1.** Pearson Correlation Coefficients calculated using the *methyKit* R package: IND10, IND50, and IND100 RRBS datasets.

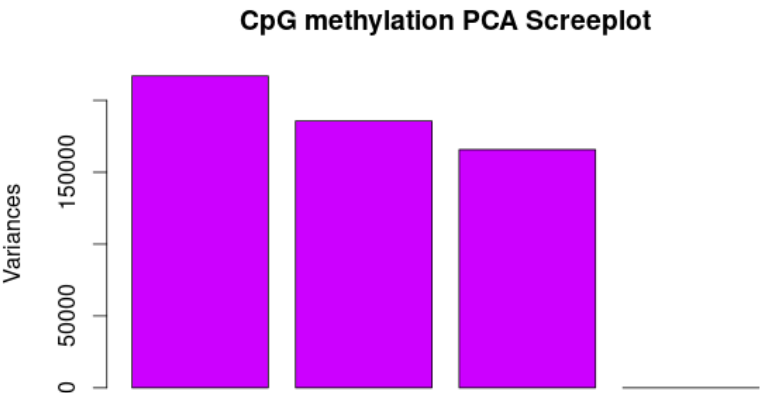

**Figure S2.** RRBS datasets - Principal Component Analysis (PCA) calculated using the *methyKit* R package: scree plot.

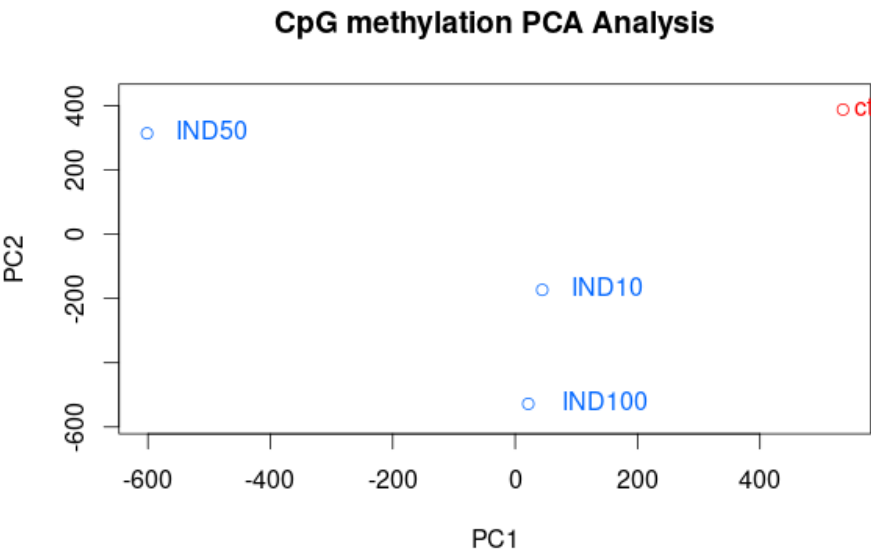

**Figure S3.** RRBS datasets – PCA calculated using the *methyKit* R package: scatter plot.

**Table S3.** Averaged differential methylation data (log2 weighted average values) of each CpG (min.cov=10) located in the promoter region of genes involved in the autophagy induction.

| INDUCTION<br>group | IND10 | IND50 | IND100 | 5-azaC |
|--------------------|-------|-------|--------|--------|
| <i>MTOR</i>        | 0.95  | -0.61 | -1.52  | 1.69   |
| <i>ULK1</i>        | -0.16 | -     | 0.36   | -0.45  |
| <i>ULK2</i>        | -0.08 | -0.01 | -0.16  | -0.02  |
| <i>ATG13</i>       | 0.68  | 0.88  | 0.25   | 0.26   |
| <i>ATG101</i>      | 0.65  | -     | -      | 1.23   |
| <i>RB1CC1</i>      | 0.4   | -     | 1.6    | -      |

**Table S4.** Averaged differential methylation data (log2 weighted average values) of each CpG (min.cov=10) located in the promoter region of genes involved in the phagophore nucleation process.

| NUCLEATION<br>group | IND10 | IND50 | IND100 | 5-azaC |
|---------------------|-------|-------|--------|--------|
| <i>BECN1</i>        | -     | -     | 0.30   | 0.29   |
| <i>PIK3R4</i>       | 0.85  | 1.43  | 0.49   | 0.75   |
| <i>ATG14</i>        | 0.61  | 0.51  | 2.46   | 2.83   |
| <i>AMBRA1</i>       | 1.01  | 2.07  | 0.12   | 0.95   |
| <i>UVRAG</i>        | 0.73  | 0.76  | 0.29   | 0.18   |
| <i>NRFB2</i>        | -0.10 | -1.14 | -0.39  | 0.63   |
| <i>TFEB.1</i>       | 0.01  | -0.67 | -0.27  | -0.10  |
| <i>TFEB.2</i>       | -0.08 | 1.00  | 0.29   | -0.03  |
| <i>BCL2.1</i>       | 1.37  | -     | -0.33  | 1.55   |
| <i>RUBCN.1</i>      | 0.81  | -0.31 | 0.26   | 0.30   |
| <i>RUBCN.2</i>      | 0.53  | 0.50  | 0.16   | -0.01  |
| <i>SH3GLB1</i>      | 1.11  | -     | -      | 1.60   |
| <i>MAPK8.2</i>      | 0.29  | -0.15 | -0.57  | 1.31   |
| <i>DAPK3.1</i>      | -0.20 | -0.22 | 0.38   | -0.32  |

**Table S5.** Averaged differential methylation data (log2 weighted average values) of each CpG (min.cov=10) located in the promoter region of genes involved in the phagophore elongation process.

| ELONGATION<br>group | IND10 | IND50 | IND100 | 5-azaC |
|---------------------|-------|-------|--------|--------|
| <i>ATG9A</i>        | -0.18 | 0.16  | 1.18   | 0.27   |
| <i>ATG3</i>         | -1.76 | 0.02  | 0.24   | 0.39   |
| <i>ATG5</i>         | 0.24  | 2.18  | -      | 1.68   |
| <i>ATG7</i>         | 1.14  | -1.35 | 0.56   | 0.86   |
| <i>ATG12</i>        | 0.58  | 2.20  | 0.53   | 0.17   |
| <i>ATG16L1</i>      | 1.26  | -     | -      | 0.93   |
| <i>ATG10</i>        | 1.03  | -     | -      | 0.01   |
| <i>MAP1LC3B.1</i>   | -0.10 | 0.53  | -0.47  | 0.23   |
| <i>MAP1LC3B.2</i>   | 0.87  | 0.39  | 0.49   | 0.69   |
| <i>WIPI1</i>        | -0.16 | -1.62 | -0.78  | 0.83   |
| <i>WIPI2</i>        | -0.66 | -1.30 | -1.72  | -1.01  |
| <i>WDR45B</i>       | -     | 2.53  | 1.50   | 0.26   |
| <i>WDR45.1</i>      | 0.13  | 1.21  | -1.09  | 0.36   |
| <i>WDR45.2</i>      | 0.83  | -     | -      | 0.99   |
| <i>GABARAPL2</i>    | -0.96 | -0.54 | -0.71  | -0.90  |
| <i>MAP1LC3A</i>     | -0.04 | -0.04 | -0.04  | -0.05  |

**Table S6.** Averaged differential methylation data (log2 weighted average values) of each CpG (min.cov=10) located in the promoter region of genes involved in the fusion process.

| FUSION<br>group  | IND10 | IND50 | IND100 | 5-azaC |
|------------------|-------|-------|--------|--------|
| <i>PLEKHM1</i>   | -     | -     | 0.95   | 0.41   |
| <i>TECPR1</i>    | -0.64 | -1.56 | -1.18  | -0.32  |
| <i>EPG5</i>      | -     | -     | -1.34  | -1.39  |
| <i>STX17</i>     | -0.18 | 0.05  | -0.09  | -0.12  |
| <i>SNAP29</i>    | -0.38 | -0.66 | -1.18  | -0.57  |
| <i>VAMP8.2</i>   | 0.30  | -0.67 | 0.00   | 0.59   |
| <i>VPS11</i>     | -0.08 | 0.00  | -0.53  | -0.27  |
| <i>VPS16</i>     | -0.80 | 0.00  | -0.97  | -0.31  |
| <i>VPS18</i>     | -0.87 | -     | -0.73  | -0.63  |
| <i>VPS33A</i>    | 0.04  | 0.38  | 0.54   | 0.32   |
| <i>VPS39</i>     | 0.04  | -1.40 | -0.20  | -0.54  |
| <i>TSNARE1.1</i> | 2.24  | -     | 1.37   | 1.02   |
| <i>YKT6</i>      | -0.17 | -0.48 | 0.10   | 0.10   |
| <i>USE1</i>      | -0.30 | -1.90 | 0.22   | 0.10   |
| <i>SNAP25</i>    | -0.01 | -     | 0.17   | -0.03  |

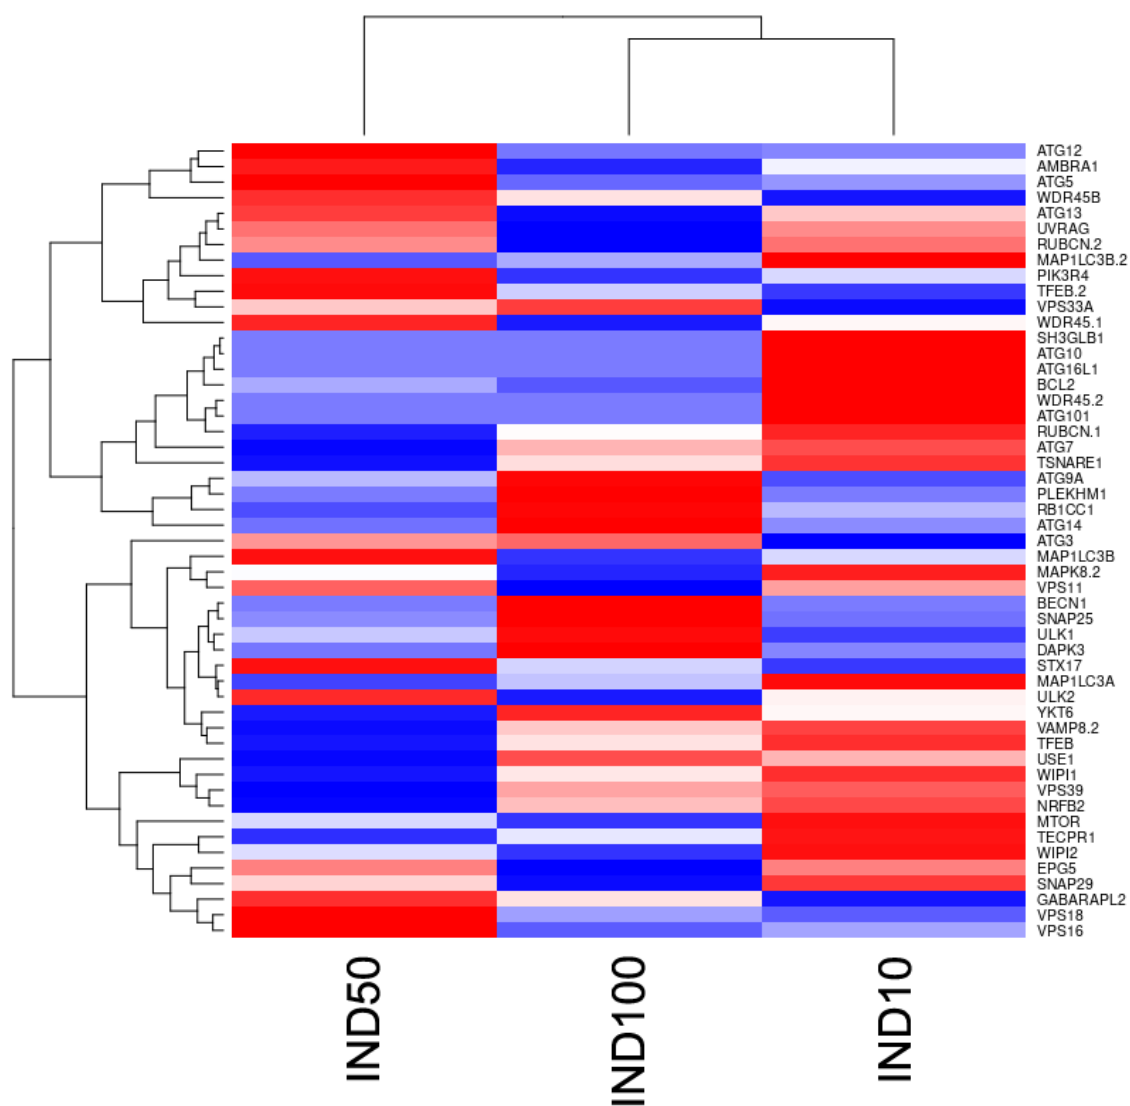

**Figure S4:** Heatmap obtained using the average values of methylation difference of the studied promoters. *PIK3C3*, *RAB7A*, *VPS41*, *INPP5E* genes were excluded due to the absence of significant data.



**Table S7.** Promoter DMRs (tiles) and their features, related to Table 1.

| Gene symbol    | strand | tile chr | tile start | TSS       | IND 10 | IND 50 | IND 100 | EH38 cCRE            | classification CGI | hg38. oreganno.id                                                                                                                                                                                              | TFBS                                                                                                                               |
|----------------|--------|----------|------------|-----------|--------|--------|---------|----------------------|--------------------|----------------------------------------------------------------------------------------------------------------------------------------------------------------------------------------------------------------|------------------------------------------------------------------------------------------------------------------------------------|
| <i>MTOR</i>    | -1     | chr1     | 11263201   | 11262551  | 30     |        |         | E1318739             | enhP               |                                                                                                                                                                                                                |                                                                                                                                    |
| <i>ULK2</i>    | -1     | chr17    | 19867801   | 19867936  | 24     |        | 28      | E1851797<br>***      | prom CGI           | OREG1175743<br>OREG1609744<br>OREG1853806<br>OREG1482646<br>OREG0399094                                                                                                                                        | TFAP2C,<br>FOXP1,<br>RB1,<br>E2F4,<br>E2F4                                                                                         |
| <i>BECN1</i>   | -1     | chr17    | 42823401   | 42824282  | 26     | 49     |         |                      | intron             |                                                                                                                                                                                                                |                                                                                                                                    |
| <i>PIK3R4</i>  | -1     | chr3     | 130747201  | 130746829 | 31     | 36     |         |                      | up-stream          | OREG1230891                                                                                                                                                                                                    | SMARCA4                                                                                                                            |
| <i>BCL2</i>    | -1     | chr18    | 63320201   | 63320128  | 13     |        | 3       | E1923297<br>**       | prom CGI           | OREG1250101<br>OREG1219989<br>OREG1488348<br>OREG0395794<br>OREG1340917                                                                                                                                        | SMARCA4,<br>SMARCA4,<br>EGR1,<br>EGR1,<br>CTCF                                                                                     |
| <i>BCL2.2</i>  | -1     | chr18    | 63318401   | 63318812  | -35    | -51    |         | E1923293             | prom CGI           | OREG1937747<br>OREG1250101<br>OREG0396743                                                                                                                                                                      | VDR,<br>SMARCA4,<br>EGR1                                                                                                           |
| <i>ATG3</i>    | -1     | chr3     | 112562801  | 112561962 | -40    |        | -20     | E2227361<br>E2227362 | enhP               |                                                                                                                                                                                                                |                                                                                                                                    |
| <i>ATG5</i>    | -1     | chr6     | 106325201  | 106325760 |        |        |         | E2490641<br>E2490642 | enhP/<br>prom CGI  | OREG1173894                                                                                                                                                                                                    | TFAP2C,<br>SMARCA4,<br>STAT1                                                                                                       |
| <i>ATG7</i>    | 1      | chr3     | 11271401   | 11272416  | -13    | -15    |         |                      | up-stream          |                                                                                                                                                                                                                |                                                                                                                                    |
| <i>WDR45.2</i> | -1     | chrX     | 49079601   | 49080073  |        |        | -15     | E2754334             | enhP CGI           | OREG1600364<br>OREG1793948<br>OREG1823967                                                                                                                                                                      | FOXA1,<br>RBL2,<br>RBL2                                                                                                            |
| <i>EPG5</i>    | -1     | chr18    | 45966201   | 45967329  | 34     |        |         |                      | intron             |                                                                                                                                                                                                                |                                                                                                                                    |
| <i>VAMP8.2</i> | 1      | chr2     | 85562201   | 85561720  | 16     | -9     | 12      |                      | intron             | NEAR TO<br>OREG1944064                                                                                                                                                                                         | ZNF263                                                                                                                             |
| <i>VPS11</i>   | 1      | chr11    | 119068401  | 119067692 | 28     | 31     |         |                      | intron             | OREG1260042<br>OREG1081042                                                                                                                                                                                     | SMARCA4,<br>TCF7L2                                                                                                                 |
| <i>VPS33A</i>  | -1     | chr12    | 122266401  | 122266494 |        |        | 10      | E1651497             | prom CGI           | OREG1250692<br>OREG1812689<br>OREG1791744<br>OREG1778450<br>OREG1220514<br>OREG1797023<br>OREG1945509<br>OREG1762962<br>OREG1612756<br>OREG1543101<br>OREG1139438<br>OREG1112385<br>OREG0231119<br>OREG1112386 | SMARCA4,<br>RBL2,<br>RBL2,<br>RBL2,<br>SMARCA4,<br>RBL2,<br>ZNF263,<br>MITF,<br>FOS,<br>ETS1,<br>ZNF263,<br>USF2,<br>USF1,<br>USF2 |

|                      |   |       |          |          |    |     |    |                       |             |                                                                                                                                                    |                                                                                            |
|----------------------|---|-------|----------|----------|----|-----|----|-----------------------|-------------|----------------------------------------------------------------------------------------------------------------------------------------------------|--------------------------------------------------------------------------------------------|
| <i>MAPK8.2</i>       | 1 | chr10 | 48306201 | 48306743 |    |     |    | <b>E1466099</b><br>** | prom<br>CGI | OREG1493767<br>OREG1173286<br>OREG1766204<br>OREG0273979<br>OREG0273980<br>OREG0367292                                                             | EGR1,<br>TFAP2C,<br>MITF,<br>ZEB1,<br>ZEB1,<br>EBF1                                        |
| <i>MAP1LC3A</i>      | 1 | chr20 | 34558801 | 34558718 | 14 | 12  | 15 | E2108528              | enhP<br>CGI |                                                                                                                                                    |                                                                                            |
| <i>SNAP25</i><br>(a) | 1 | chr20 | 10217801 | 10218830 |    |     | 12 | E2097209              | enhP<br>CGI |                                                                                                                                                    |                                                                                            |
| <i>SNAP25</i><br>(b) | 1 | chr20 | 10219601 | 10218830 |    | -13 | 11 | E2097215              | prom        | OREG1893190<br>OREG1181996<br>OREG1844288<br>OREG1848497<br>OREG1856839<br>OREG1232693<br>OREG1485028<br>OREG0004318<br>OREG0004317<br>OREG1100322 | STAT1,<br>TFAP2C,<br>RB1,<br>RB1,<br>RB1,<br>SMARCA4,<br>E2F4,<br>REST,<br>REST,<br>TFAP2C |

UCSC hg38 functional annotations:

EH38 CCRE: ENCODE Candidate Cis-Regulatory Elements (cCREs) combined from all cell types [1]:

enhP: proximal enhancer-like signature

prom: promoter-like signature

\*\* DNase Z-score, H3K4me3 Z-score >1.64 in CaCo-2 cells

\*\*\* DNase Z-score, H3K4me3 Z-score, CTCF Z-score >1.64 in CaCo-2 cells.

ORegAnno: Regulatory elements from ORegAnno [2].

Abbreviations:

TSS: Transcription Start Site

TFBS: Transcription Factor Binding Site

CGI: CpG Island

**Table S8.** Gene body DMRs (tiles) and their features, related to Table 2.

| Gene symbol | strand | tile chr | tile start | IND 10 | IND 50 | IND 100 | EH38 cCRE            | classification CGI | hg38. oreganno.id                                                                                                                                                                | TFBS                                                       |
|-------------|--------|----------|------------|--------|--------|---------|----------------------|--------------------|----------------------------------------------------------------------------------------------------------------------------------------------------------------------------------|------------------------------------------------------------|
| MTOR        | -1     | chr1     | 11119401   | 13     |        | -22     |                      | intron             |                                                                                                                                                                                  |                                                            |
|             |        | chr1     | 11122601   |        | -47    |         |                      | intron             |                                                                                                                                                                                  |                                                            |
|             |        | chr1     | 11193601   | -13    | -10    | -17     | E1318692             | enhD               | ANGPTL7 exon                                                                                                                                                                     |                                                            |
|             |        | chr1     | 11250001   |        |        | 23      |                      | intron             |                                                                                                                                                                                  |                                                            |
|             |        | chr1     | 11261201   |        | -23    |         |                      | intron             |                                                                                                                                                                                  |                                                            |
| ULK1        | 1      | chr12    | 131896401  | 14     |        |         | E1657097 **          | prom               | OREG1193847<br>OREG1601983<br>OREG1660293<br>OREG1824583<br>OREG1789197<br>OREG1854905<br>OREG0833612<br>OREG0986170<br>OREG0880598<br>OREG1809256<br>OREG1846437<br>OREG1843192 | ULK1, TFAP2C, FOXA1, RBL2, RB1, MAFF, NFE2::MAF, MAFK, RB1 |
|             |        | chr12    | 131908201  |        |        | 17      |                      | intron CGI         |                                                                                                                                                                                  |                                                            |
|             |        | chr12    | 131909401  |        | -17    |         |                      | intron CGI         |                                                                                                                                                                                  |                                                            |
|             |        | chr12    | 131919801  |        |        | -26     |                      | intron             |                                                                                                                                                                                  |                                                            |
|             |        | chr12    | 131919801  |        |        | -26     |                      | intron             |                                                                                                                                                                                  |                                                            |
| ULK2        | -1     | chr17    | 19772601   |        |        |         |                      | intron             |                                                                                                                                                                                  |                                                            |
|             |        | chr17    | 19772801   |        | -20    | -21     |                      | intron             | near to E1851762                                                                                                                                                                 |                                                            |
|             |        | chr17    | 19836201   | 16     | 20     | 14      |                      | intron             |                                                                                                                                                                                  |                                                            |
|             |        | chr17    | 19838801   |        |        |         |                      | intron             |                                                                                                                                                                                  |                                                            |
|             |        | chr17    | 19842401   |        |        | 24      |                      | intron             |                                                                                                                                                                                  |                                                            |
| ATG9A       | -1     | chr2     | 219219401  | 15     |        | 51      | E2075977             | enhP               | near to ABCB6 promoter                                                                                                                                                           |                                                            |
| PIK3R4      | -1     | chr3     | 130727401  |        | 74     |         | E2238076<br>E2238077 | enhD               |                                                                                                                                                                                  |                                                            |
| AMBRA1      | -1     | chr11    | 46429001   |        |        | 13      |                      | intron             | H3K27Ac                                                                                                                                                                          |                                                            |
|             |        | chr11    | 46520601   |        | 21     |         |                      | intron             |                                                                                                                                                                                  |                                                            |
|             |        | chr11    | 46548201   |        | 17     | 19      |                      | exon2              |                                                                                                                                                                                  |                                                            |
|             |        | chr11    | 46553001   |        |        |         |                      | intron             |                                                                                                                                                                                  |                                                            |
|             |        | chr11    | 46566201   |        | -16    |         |                      | intron             |                                                                                                                                                                                  |                                                            |
| UVRAG       | 1      | chr11    | 75877401   | 20     | 20     | 22      |                      | intron             |                                                                                                                                                                                  |                                                            |
|             |        | chr11    | 75887401   | -8     |        | -18     |                      | intron             |                                                                                                                                                                                  |                                                            |
|             |        | chr11    | 75974401   | 24     |        |         |                      | intron             |                                                                                                                                                                                  |                                                            |
| ATG7        | 1      | chr3     | 11290801   | -22    |        |         | E2178358             | enhP               | OREG1616328<br>OREG0665690<br>OREG0741992                                                                                                                                        | ATG7,FOS, FOSL1, JUNB                                      |

|              |    |       |           |     |     |                       |             |                                                          |                                             |
|--------------|----|-------|-----------|-----|-----|-----------------------|-------------|----------------------------------------------------------|---------------------------------------------|
|              |    | chr3  | 11379801  | -37 | -29 | E2178411              | enhD        | OREG1256740<br>OREG0563863<br>OREG0730235<br>OREG1675345 | ATG7, SMARCA4,<br>DUX4, JUN,<br>ATG7, GATA2 |
| ATG10        | 1  | chr5  | 82037401  | -18 |     |                       | intron      |                                                          |                                             |
| MAP1LC3B     | 1  | chr16 | 87390401  | -17 | -15 |                       | intron      |                                                          |                                             |
| WIPI2        | 1  | chr7  | 5222801   | -11 |     | <b>E2531309</b><br>** | enhD/intron | OREG1602525<br>OREG1660808<br>OREG1194239                | WIPI2, FOXA1,<br>TFAP2C                     |
| WDR45B       | -1 | chr17 | 82646801  | 17  |     | E1893683              | intron      |                                                          |                                             |
|              |    | chr17 | 82647001  |     | 21  | E1893683              | intron      |                                                          |                                             |
| WDR45.1/.2   | -1 | chrX  | 49099601  | 30  | 24  |                       | intron      | H3K27Ac in<br>K562                                       |                                             |
| RUBCN.1/.2   | -1 | chr3  | 197707201 |     | -12 |                       | intron      |                                                          |                                             |
|              |    | chr3  | 197729201 |     | -9  | -24                   | intron      |                                                          |                                             |
| RUBCN.2      | -1 | chr3  | 197739401 |     | -20 | E2273633<br>E2273634  | intron      |                                                          |                                             |
| RAB7A        | 1  | chr3  | 128743201 | 14  |     |                       | intron      | OREG1926731                                              | TRIM28                                      |
| PLEKHM1      | -1 | chr17 | 45437001  | 10  |     |                       | last exon   | OREG0844941<br>OREG0890141                               | MAFF, MAFK                                  |
|              |    | chr17 | 45453401  |     | -20 | E1866153              | exon        |                                                          |                                             |
|              |    | chr17 | 45485801  |     | -17 |                       | intron      |                                                          |                                             |
| EPG5         | -1 | chr18 | 45966201  | 34  |     |                       | intron      |                                                          |                                             |
| INPP5E       | -1 | chr9  | 136430201 |     | -12 | E2736673              | enhD        |                                                          |                                             |
|              |    | chr9  | 136432601 |     |     |                       | intron CGI  |                                                          |                                             |
|              |    | chr9  | 136432801 | -18 | -20 |                       | intron      | OREG1510897                                              | EGR1                                        |
| SNAP29       | 1  | chr22 | 20860401  | -24 | -14 | -22                   | intron      | OREG1489467<br>OREG1946017                               | PI4KA, EGR1,<br>TOP3B, ZNF263               |
| VAMP8.2      | 1  | chr2  | 85562801  |     | 21  | 20                    | intron      |                                                          |                                             |
|              |    | chr2  | 85563001  |     |     | 11                    | intron      |                                                          |                                             |
|              |    | chr2  | 85563201  | -12 |     | -16                   | intron      |                                                          |                                             |
|              |    | chr2  | 85563601  |     | -10 |                       | intron      | OREG1303251                                              | CEBPA                                       |
| VPS11        | 1  | chr11 | 119072401 | 14  |     |                       | intron      |                                                          |                                             |
| VPS18        | 1  | chr15 | 40899601  |     | 16  | 15                    | exon        |                                                          |                                             |
|              |    | chr15 | 40899801  | -19 |     |                       | exon        |                                                          |                                             |
| VPS33A       | -1 | chr12 | 122241201 |     | 11  |                       | intron      |                                                          |                                             |
| MAPK8.2      | 1  | chr10 | 48346401  |     |     | E1466129              | CTCF        |                                                          |                                             |
| DAPK3        | -1 | chr19 | 3964801   |     |     |                       | exon CGI    | OREG1505997                                              | EGR1                                        |
| GABARAPL2    | 1  | chr16 | 75571801  | -18 | -38 | E1828346              | intron      |                                                          |                                             |
| TSNARE1.1/.2 | -1 | chr8  | 142237601 |     | 18  |                       | intron      | OREG1516995                                              | EGR1                                        |
|              |    | chr8  | 142243201 | -20 |     |                       | intron      |                                                          |                                             |
|              |    | chr8  | 142244001 |     |     |                       | intron      |                                                          |                                             |

|          |    |       |           |     |     |     |                      |             |          |
|----------|----|-------|-----------|-----|-----|-----|----------------------|-------------|----------|
|          |    | chr8  | 142249201 |     | -27 |     | intron               |             |          |
|          |    | chr8  | 142252001 |     |     | -17 | intron CGI           |             |          |
|          |    | chr8  | 142253001 |     | 21  |     | intron               |             |          |
|          |    | chr8  | 142253201 |     | 17  |     | intron               |             |          |
|          |    | chr8  | 142257201 |     |     |     | intron               |             |          |
|          |    | chr8  | 142261601 | 37  |     |     | intron               | OREG1946662 | ZNF263   |
|          |    | chr8  | 142271201 | 61  | 63  | 28  | exon or<br>intron    | OREG1517008 | EGR1     |
|          |    | chr8  | 142325801 |     | -16 |     | E2674338<br>E2674339 | enhD CGI    |          |
|          |    | chr8  | 142326001 |     |     | 11  | E2674339             | enhD CGI    |          |
|          |    | chr8  | 142326201 |     |     | 13  | 13                   | E2674339    | enhD CGI |
|          |    | chr8  | 142326401 | -15 |     |     | E2674339             | enhD CGI    |          |
|          |    | chr8  | 142346401 |     | -16 | -19 | E2674353             | K4m3        |          |
| TSNARE.1 | -1 | chr8  | 142361001 | -11 |     |     |                      | intron      |          |
|          |    | chr8  | 142375201 |     |     | 36  |                      | intron      |          |
| SNAP25   | 1  | chr20 | 10278801  |     |     | 15  |                      | intron      |          |

UCSC hg38 functional annotations:

EH38 CCRE: ENCODE Candidate Cis-Regulatory Elements (cCREs) combined from all cell types [1]:

enhP: proximal enhancer-like signature

enhD: distal enhancer-like signature

K4m3: DNase-H3K4me3

CTCF: CTCF-only

\*\* DNase Z-score, H3K4me3 Z-score >1.64 in CaCo-2 cells.

ORegAnno: Regulatory elements from ORegAnno [2].

Abbreviations:

TFBS: Transcription Factor Binding Site

CGI: CpG Island.

## References:

1. ENCODE Project Consortium. Expanded Encyclopedias of DNA Elements in the Human and Mouse Genomes. *Nature*. 2020 July 30;583(7818):699-710. DOI: 10.1038/s41586-020-2493-4
2. Lesurf R, Cotto KC, Wang G, Griffith M, Kasaian K, Jones SJ, Montgomery SB, Griffith OL, Open Regulatory Annotation Consortium. ORegAnno 3.0: a community-driven resource for curated regulatory annotation. *Nucleic Acids Res*. 2016 Jan 4;44(D1):D126-32. DOI: 10.1093/nar/gkv1203
